# Supplementary material
Source: PubMed Central journal article supplement (PMC6679687)
Supplement: NIHMS1040855-supplement-Supplemental_Table_2.pdf [file NIHMS1040855-supplement-Supplemental_Table_2.pdf]

**Table 2: Subgroup Analyses for oral oseltamivir within 48 hours or after 48 hours**

| Outcome                            | Confirmed influenza                                                             | Age | Baseline risk (e.g. immunocompromised)                                                                                                                                    | Dosage of antiviral                                                                                                                   | Type of Influenza A/B | Pandemic vs Seasonal | Severity of Influenza | Setting | Funding |
|------------------------------------|---------------------------------------------------------------------------------|-----|---------------------------------------------------------------------------------------------------------------------------------------------------------------------------|---------------------------------------------------------------------------------------------------------------------------------------|-----------------------|----------------------|-----------------------|---------|---------|
| <b>Mortality</b>                   | Confirmed<br>0.67 (0.25, 1.76)<br>Unconfirmed<br>0.03 (0.00, 0.21)<br>p = 0.005 | -   | Interaction among<br><i>low risk population</i><br>OR 1.47 (0.87, 2.50)<br><i>immunocompromised</i><br>OR 0.16 (0.02, 1.34)<br><i>pregnant women</i><br>OR 0.03 (0, 0.21) | Interaction between<br><i>standard dose</i><br>OR 0.32 (0.07, 1.41)<br><i>300 mg/daily (also ICU setting)</i><br>OR 1.76 (0.94, 3.29) | -                     | -                    | -                     | NS      | -       |
| <b>Hospitalization</b>             | NS                                                                              | -   | NS                                                                                                                                                                        | -                                                                                                                                     | -                     | -                    | -                     | -       | -       |
| <b>ICU admissions</b>              | NS                                                                              | -   | NS                                                                                                                                                                        | -                                                                                                                                     | -                     | -                    | -                     | NS      | -       |
| <b>Duration of hospitalization</b> | -                                                                               | -   | -                                                                                                                                                                         | -                                                                                                                                     | -                     | -                    | -                     | -       | -       |
| <b>Alleviation symptoms</b>        | -                                                                               | -   | -                                                                                                                                                                         | -                                                                                                                                     | -                     | -                    | -                     | -       | -       |
| <b>Complications</b>               | -                                                                               | -   | -                                                                                                                                                                         | -                                                                                                                                     | -                     | -                    | -                     | -       | -       |

“-“ indicates insufficient data from studies to conduct subgroup analyses; NS indicates non significant interaction
